# Supplementary material
Source: PubMed Central journal article supplement (PMC6827115)
Supplement: Supplemental6_material.pdf [file Supplemental6_material.pdf]

# Supplementary material

## Deleterious Role of Endothelial Lectin-like Oxidized Low-density Lipoprotein Receptor-1 (LOX-1) in Ischemia/Reperfusion Cerebral Injury

Alexander Akhmedov, PhD,<sup>1\*</sup> Nicole R. Bonetti, MD,<sup>1,2\*</sup> Martin F. Reiner, MD,<sup>1,2</sup> Remo D. Spescha, PhD,<sup>1</sup> Heidi Amstalden, MSc,<sup>1</sup> Mario Merlini, PhD,<sup>3</sup> Daniel S. Gaul, PhD,<sup>1</sup> Candela Diaz-Cañestro, MSc,<sup>1</sup> Rebecca S. Spescha, PhD,<sup>4,5</sup> Aurora Semerano, MD,<sup>6</sup> Giacomo Giacalone, MD,<sup>6</sup> Gianluigi Savarese, MD,<sup>7</sup> Fabrizio Montecucco, MD,<sup>8,9,10</sup> Luka Kulic, MD,<sup>4,5</sup> Roger M. Nitsch, MD,<sup>4,5</sup> Christian M. Matter, MD,<sup>1,11</sup> Gerd A. Kullak-Ublick, MD,<sup>12</sup> Maria Sessa, MD,<sup>6</sup> Thomas F. Lüscher, MD,<sup>1,11</sup>, Jürg H. Beer, MD,<sup>1,2</sup> Luca Liberale, MD,<sup>1,8\*</sup> Giovanni G. Camici, PhD,<sup>1,5\*</sup>

\* These authors contributed equally to this work

<sup>1</sup>Center for Molecular Cardiology, Schlieren Campus, University of Zurich, Wagistrasse 12, 8952 Schlieren, Switzerland; <sup>2</sup>Department of Internal Medicine, Cantonal Hospital of Baden, Im Ergel 1, 5404 Baden, Switzerland; <sup>3</sup>Gladstone Institute of Neurological Disease, University of California, San Francisco, 1650 Owens Street, San Francisco, CA 94158, USA; <sup>4</sup>Division of Psychiatry Research, University of Zurich, Wagistrasse 12, 8952 Schlieren, Switzerland; <sup>5</sup>Zurich Neuroscience Center, University of Zurich, Winterthurer Strasse 190, 8057 Zurich, Switzerland; <sup>6</sup>Department of Neurology, San Raffaele Scientific Institute, via Olgettina 60, 20132 Milano, Italy; <sup>7</sup>Division of Cardiology, Department of Medicine, Karolinska Institute, N305, 171 76, Stockholm, Sweden; <sup>8</sup>First Clinic of Internal Medicine, Department of Internal Medicine, University of Genoa, 6 viale Benedetto XV, 16132 Genoa, Italy; <sup>9</sup>Ospedale Policlinico San Martino 10 Largo Benzi, 16132 Genoa, Italy; <sup>10</sup>Centre of Excellence for Biomedical Research (CEBR), University of Genoa, 9 viale Benedetto XV, 16132 Genoa, Italy; <sup>11</sup>Department of Cardiology, University Heart Center, University Hospital Zurich, Zurich, Switzerland;

<sup>12</sup>Department of Clinical Pharmacology and Toxicology, University Hospital Zurich, Zurich, Switzerland

**Address for correspondence:**

Prof. Dr. Giovanni G. Camici

Center for Molecular Cardiology, University of Zurich, Wagistrasse 12, CH-8952 Schlieren, Switzerland. E-Mail address: [giovanni.camici@uzh.ch](mailto:giovanni.camici@uzh.ch). Phone +41 44 635 64 68 Fax +41 44 635 68 27

**Source of Funding**

The present work was supported by the Swiss National Science Foundation (Drs. Camici [310030\_175546] and Lüscher [310030\_166576]), the Alfred and Annemarie von Sikk Grants for Translational and Clinical Research Cardiology and Oncology to Dr. Camici and the Foundation for Cardiovascular Research–Zurich Heart House. G.G. Camici is the recipient of a Sheikh Khalifa's Foundation Assistant Professorship at the Faculty of Medicine, University of Zurich.

**Running headline:** Endothelial LOX-1 worsens ischemic stroke damage

Supplementary Figure 1

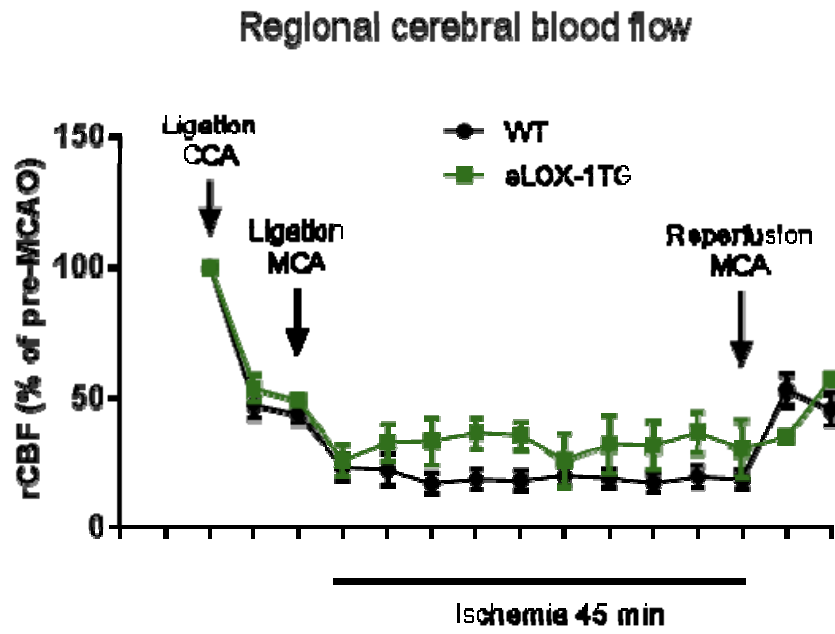

## Figure Legends

**Supplementary Figure 1. Regional cerebral blood flow (rCBF) reduction during transient middle cerebral artery occlusion (tMCAO).** Cerebral blood flow in the middle cerebral artery region was reduced to similar extents in wild type (WT) and endothelial-specific LOX-1 transgenic (eLOX-1TG) animals during tMCAO, as assessed by a laser Doppler flowmetry.
